# Supplementary material
Source: MDPI journal article supplement (https://www.mdpi.com/2076-3417/14/7/3125)
Supplement: s1 [file s1]

**Supplementary file S1.** Correlation of the variables with the dimensions of the Principal Component Analysis.

|                                 |         | Dimension 1<br>(VAF = 56.6%) | Dimension 2<br>(VAF = 21.0%) | Dimension 3<br>(VAF = 12.2%) | Dimension 4<br>(VAF = 8.8%) |
|---------------------------------|---------|------------------------------|------------------------------|------------------------------|-----------------------------|
| Average UCI Score               | Maximum | 0.91                         | -0.14                        | 0.17                         | 0.34                        |
|                                 | Minimum | 0.9                          | -0.01                        | -0.15                        | 0.39                        |
|                                 | Mean    | 0.93                         | -0.08                        | 0.02                         | 0.37                        |
| Rank                            | Maximum | -0.92                        | 0.07                         | -0.03                        | 0.36                        |
|                                 | Minimum | -0.9                         | -0.03                        | 0.21                         | 0.35                        |
|                                 | Mean    | -0.93                        | 0.02                         | 0.09                         | 0.36                        |
| Age of maximal scoring          |         | 0.2                          | 0.87                         | 0.43                         | -0.01                       |
| Age of first top classification |         | 0.13                         | 0.98                         | 0.01                         | 0.03                        |
| Number of top classifications   |         | 0.14                         | -0.38                        | 0.9                          | -0.11                       |
