# Supplementary material
Source: MDPI journal article supplement (https://www.mdpi.com/2076-3417/14/7/3125)
Supplement: s1 [file s1]

**Supplementary file 2.** Influence of the Relative Age Effect on the median Average Corrected Score.

| Category  | Sex | Discipline  | Median Average Corrected Score |                |                |                | Wallis $\chi^2$ | p-value |
|-----------|-----|-------------|--------------------------------|----------------|----------------|----------------|-----------------|---------|
|           |     |             | Q <sub>1</sub>                 | Q <sub>2</sub> | Q <sub>3</sub> | Q <sub>4</sub> |                 |         |
| Junior    | F   | Sprint      | -0.2                           | -0.33          | -0.46          | 0.4            | 2.81            | 0.42    |
|           |     | Keirin      | -0.32                          | -0.36          | -0.41          | -0.17          | 3.06            | 0.38    |
|           |     | Scratch     | -0.52                          | -0.43          | -0.19          | -0.19          | 7.08            | 0.07    |
|           |     | Points Race | -0.08                          | -0.52          | -0.29          | -0.55          | 2.41            | 0.49    |
|           | M   | Sprint      | -0.33                          | -0.21          | -0.52          | -0.34          | 1.34            | 0.72    |
|           |     | Keirin      | -0.34                          | -0.48          | -0.35          | -0.41          | 0.76            | 0.86    |
|           |     | Scratch     | -0.4                           | -0.11          | -0.34          | -0.21          | 1.89            | 0.6     |
|           |     | Points Race | -0.26                          | -0.25          | -0.33          | -0.33          | 0.66            | 0.88    |
| Achievers | F   | Sprint      | 0.99                           | 0.32           | 0.07           | 1.72           |                 |         |
|           |     | Keirin      | 0.61                           | -0.23          | 0.15           | 1.54           |                 |         |
|           |     | Scratch     | -0.18                          | 0.3            | -0.54          | 2.06           |                 |         |
|           |     | Points Race | 0.01                           | 0.24           | 0.43           | -0.73          |                 |         |
|           | M   | Sprint      | -0.2                           | 0.87           | 0.77           | 1.29           |                 |         |
|           |     | Keirin      | 0.23                           | 0.1            | 0.33           | 0.09           |                 |         |
|           |     | Scratch     | 0.2                            | -0.58          | -0.67          | 1.15           |                 |         |
|           |     | Points Race | -0.41                          | -0.48          | 0.52           | 0.02           |                 |         |
| Elite     | F   | Sprint      | -0.75                          | 0.12           | -0.41          | -0.03          | 3.19            | 0.36    |
|           |     | Keirin      | -0.71                          | -0.33          | -0.32          | 0.01           | 3.39            | 0.34    |
|           |     | Scratch     | -0.46                          | 0.16           | 0.73           | -0.48          | 2               | 0.57    |
|           |     | Points Race | -0.4                           | -0.16          | -0.15          | -0.16          | 1.6             | 0.66    |
|           | M   | Sprint      | -0.21                          | -0.41          | -0.44          | -0.27          | 0.59            | 0.9     |
|           |     | Keirin      | -0.12                          | -0.34          | -0.5           | -0.27          | 2.41            | 0.49    |
|           |     | Scratch     | -0.27                          | -0.38          | -0.29          | -0.27          | 2.41            | 0.49    |
|           |     | Points Race | -0.35                          | -0.37          | -0.29          | -0.36          | 0.08            | 0.99    |

Notes: Q1: Born between January and March; Q2: Born between April and June; Q3: Born between July and September; Q4: Born between October and December; F : Female; M : Male.
